# Supplementary material
Source: PubMed Central journal article supplement (PMC4119401)

**a**

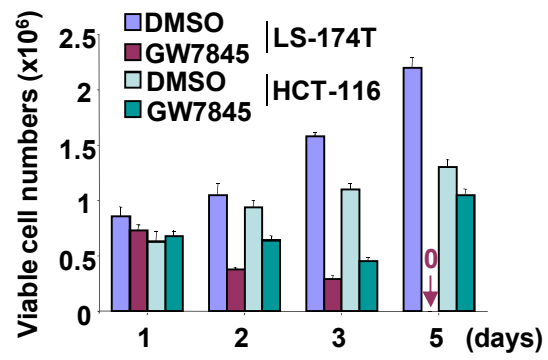

**b**

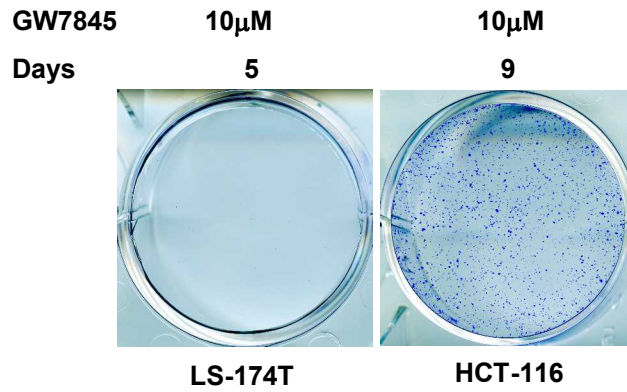

Supplement: NIHMS549221-supplement-supplement_1.pdf [file NIHMS549221-supplement-supplement_1.pdf]
